# Supplementary material for: Two-year follow-up cohort study focused on gender-specific associations between socioeconomic status and body weight changes in overweight and obese middle-aged and older adults
Source: HighWire-hosted journal article supplement (doi:10.1136/bmjopen-2021-050127), 2021-07-01
Supplement: bmjopen-2021-050127supp001_data_supplement.pdf [file bmjopen-2021-050127supp001_data_supplement.pdf]

## Supplementary Material

### A 2-Year Follow-Up Cohort Study Focused on Gender-Specific Associations Between Socioeconomic Status and Body Weight Changes in Overweight and Obese Middle-Aged and Older Adults

Table S1. Sensitivity analysis. ORs (95% CIs) establishing the socio-economic determinants of individual weight change paradigm, stratified by gender.

| Variable                                               | Men                    |                     |                      | Women                  |                     |                    |
|--------------------------------------------------------|------------------------|---------------------|----------------------|------------------------|---------------------|--------------------|
|                                                        | Stable<br>>-3% and <3% | Gained<br>≥3%       | Lost<br>≥3%          | Stable<br>>-3% and <3% | Gained<br>≥3%       | Lost<br>≥3%        |
| Age group<br>60-64y vs 40-59y                          | 1.12 (0.73, 1.72)      | 1.05 (0.62, 1.70)   | 0.79 (0.44, 1.35)    | 1.50 (1.06, 2.12)*     | 0.55 (0.36, 0.84)** | 1.03 (0.66, 1.57)  |
| Education<br>Upper level vs lower level                | 1.56 (1.04, 2.34)*     | 0.55 (0.35, 0.87)** | 1.01 (0.61, 1.75)    | 0.80 (0.54, 1.18)      | 0.98 (0.64, 1.52)   | 1.52 (0.91, 2.70)  |
| Marital status<br>In a relationship vs single          | 1.56 (0.95, 2.54)      | 0.47 (0.28, 0.80)** | 1.30 (0.69, 2.69)    | 0.86 (0.64, 1.16)      | 1.13 (0.80, 1.60)   | 1.10 (0.75, 1.63)  |
| Professional activity<br>Active vs inactive            | 1.05 (0.73, 1.52)      | 1.08 (0.70, 1.72)   | 0.85 (0.54, 1.35)    | 1.24 (0.95, 1.62)      | 1.05 (0.78, 1.42)   | 0.67 (0.47, 0.93)* |
| Net income per household<br>From €450 to €679 vs <€450 | 0.92 (0.36, 2.28)      | 0.36 (0.13, 1.00)*  | 8.85 (1.66, 164.24)* | 0.87 (0.52, 1.46)      | 1.46 (0.79, 2.79)   | 0.81 (0.43, 1.56)  |
| From €680 to 1,139 vs <€450                            | 0.96 (0.40, 2.22)      | 0.44 (0.18, 1.10)   | 7.04 (1.39, 128.61)  | 0.72 (0.43, 1.20)      | 1.33 (0.72, 2.52)   | 1.20 (0.66, 2.23)  |
| Over €1,140 vs <€450                                   | 1.23 (0.52, 2.82)      | 0.40 (0.17, 0.99)*  | 5.29 (1.04, 96.63)   | 0.61 (0.34, 1.09)      | 1.87 (0.96, 3.74)   | 1.04 (0.52, 2.10)  |
| Not specified vs <€450                                 | 1.10 (0.48, 2.44)      | 0.47 (0.20, 1.10)   | 5.34 (1.09, 96.49)   | 0.89 (0.56, 1.40)      | 1.68 (0.98, 3.01)   | 0.65 (0.37, 1.17)  |

**Notes:** Reference categories: gender female, age group 40-59 years, lower level of education, being single, occupational inactive, net income per household <€450. \*  $P < 0.05$ ; \*\*  $P < 0.01$ ; \*\*\*  $P < 0.00$
